# Supplementary material for: Effects of nucleases on cell-free extrachromosomal circular DNA
Source: JCI journal article supplement (doi:10.1172/jci.insight.156070), 2022-04-21
Supplement: sd1 [file 1]

**Supplementary Figure 1:** Area-under-the-curve (AUC) values of plasma eccDNA in wild-type ( $N = 12$ ),  $Dnase1^{-/-}$  ( $N = 11$ ) and  $Dnase113^{-/-}$  ( $N = 11$ ) mice.  $P < 0.0001$  for both peak clusters, Kruskal-Wallis test.

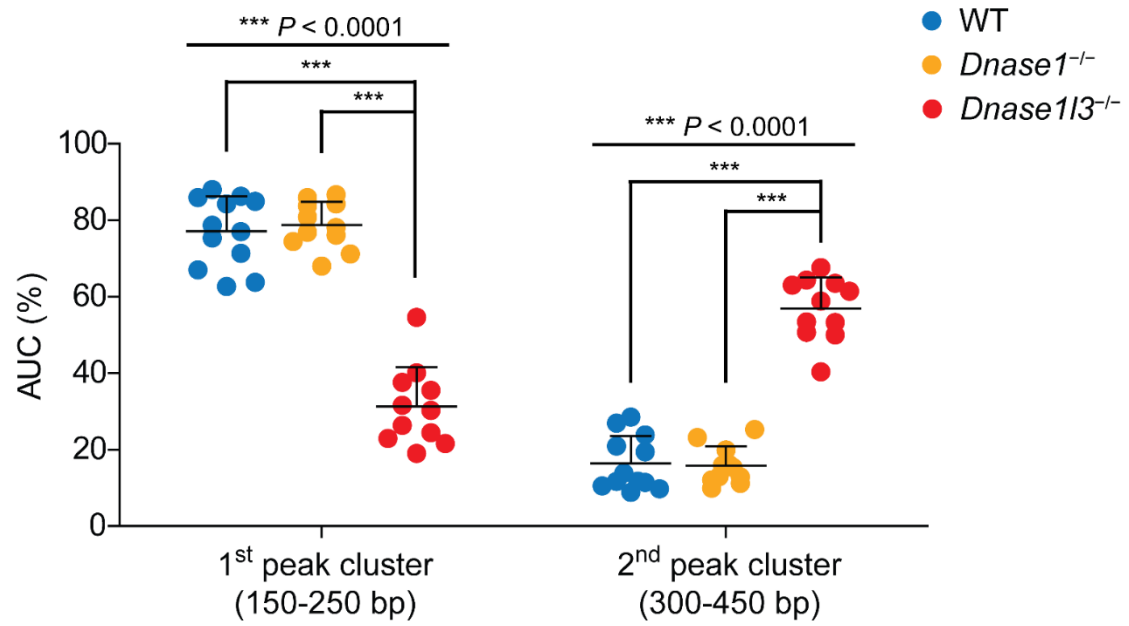

**Supplementary Figure 2: EccDNA distributions across various genomic elements relative to the expected frequencies.** To define the expected frequencies, we first generated eccDNA loci from random genomic coordinates via computer simulation. We then calculated the frequencies of these artificially-generated eccDNA loci across various genomic elements. These frequency values generated by computer simulation were denoted as expected frequencies. The observed frequencies of eccDNA from real sequencing data were then divided by their expected frequencies for each genomic element, which is denoted as “Fold change” in the y-axis.

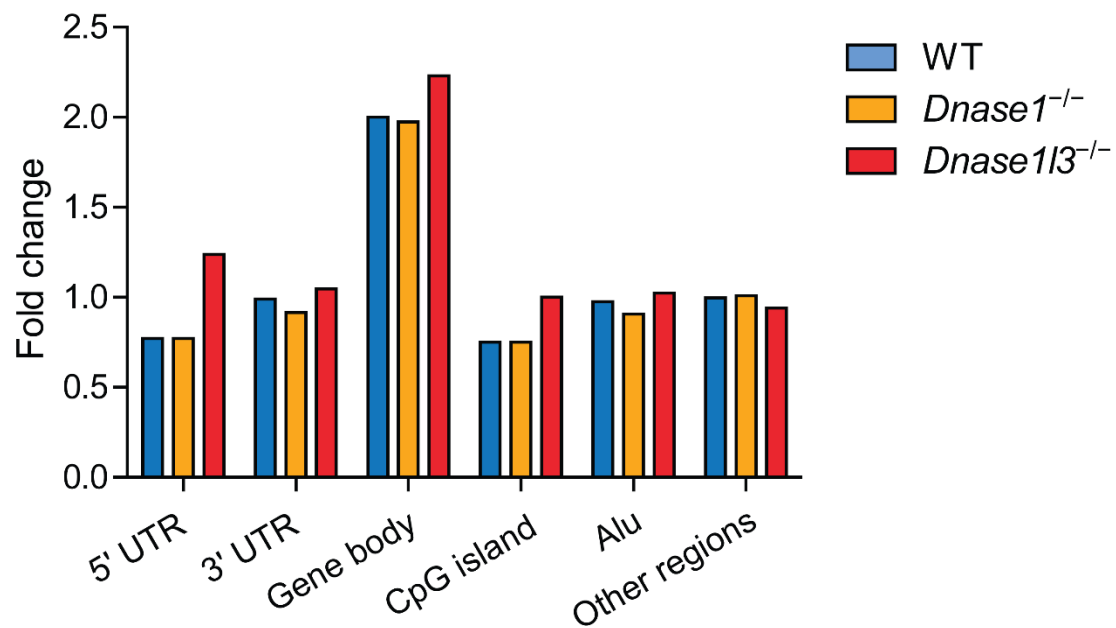

**Supplementary Figure 3: Tissue eccDNA identification.** (A) Illustrations of experimental approaches for eccDNA enrichment and sequencing from mouse tissues. (B-D) Size profiles of liver eccDNA from wild-type ( $N = 5$ ),  $Dnase1^{-/-}$  ( $N = 5$ ) and  $Dnase113^{-/-}$  ( $N = 5$ ) mice using the RCA-based method, respectively. (E-G) Size profiles of buffy coat eccDNA from wild-type ( $N = 6$ ),  $Dnase1^{-/-}$  ( $N = 4$ ) and  $Dnase113^{-/-}$  ( $N = 5$ ) mice using the RCA-based method, respectively.

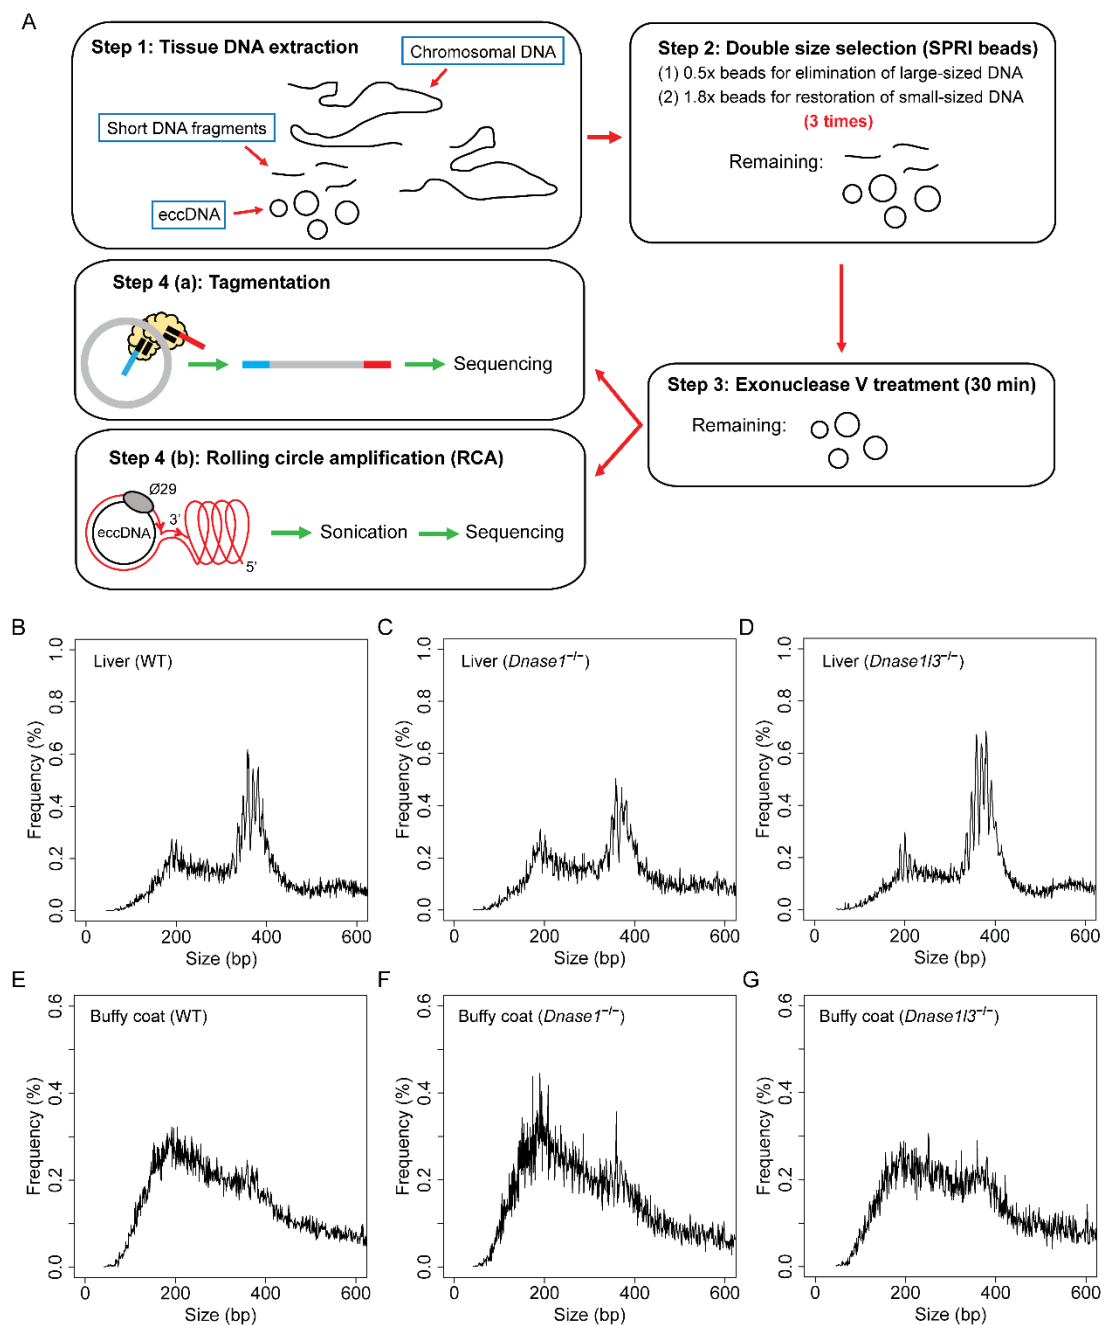

**Supplementary Figure 4: Size profiles of tissue eccDNA size in mice.** Different colors represent eccDNA size profiles of different individual mice.

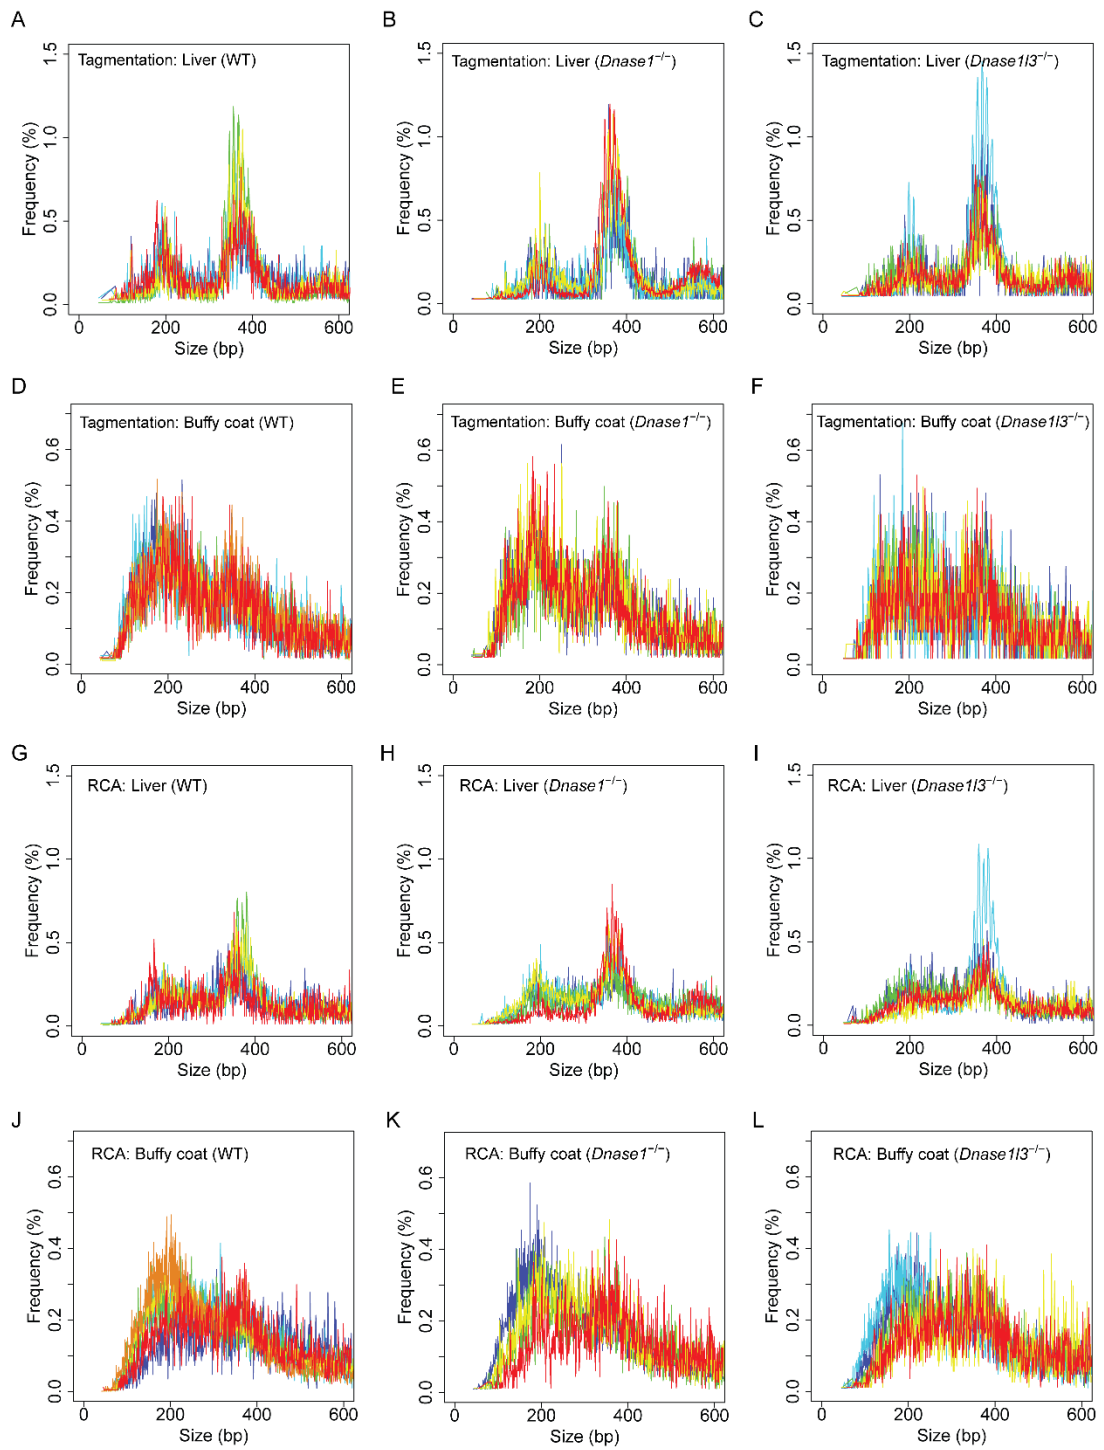

**Supplementary Figure 5:** Mouse eccDNA size distributions in different tissue types detected by ATAC-seq.

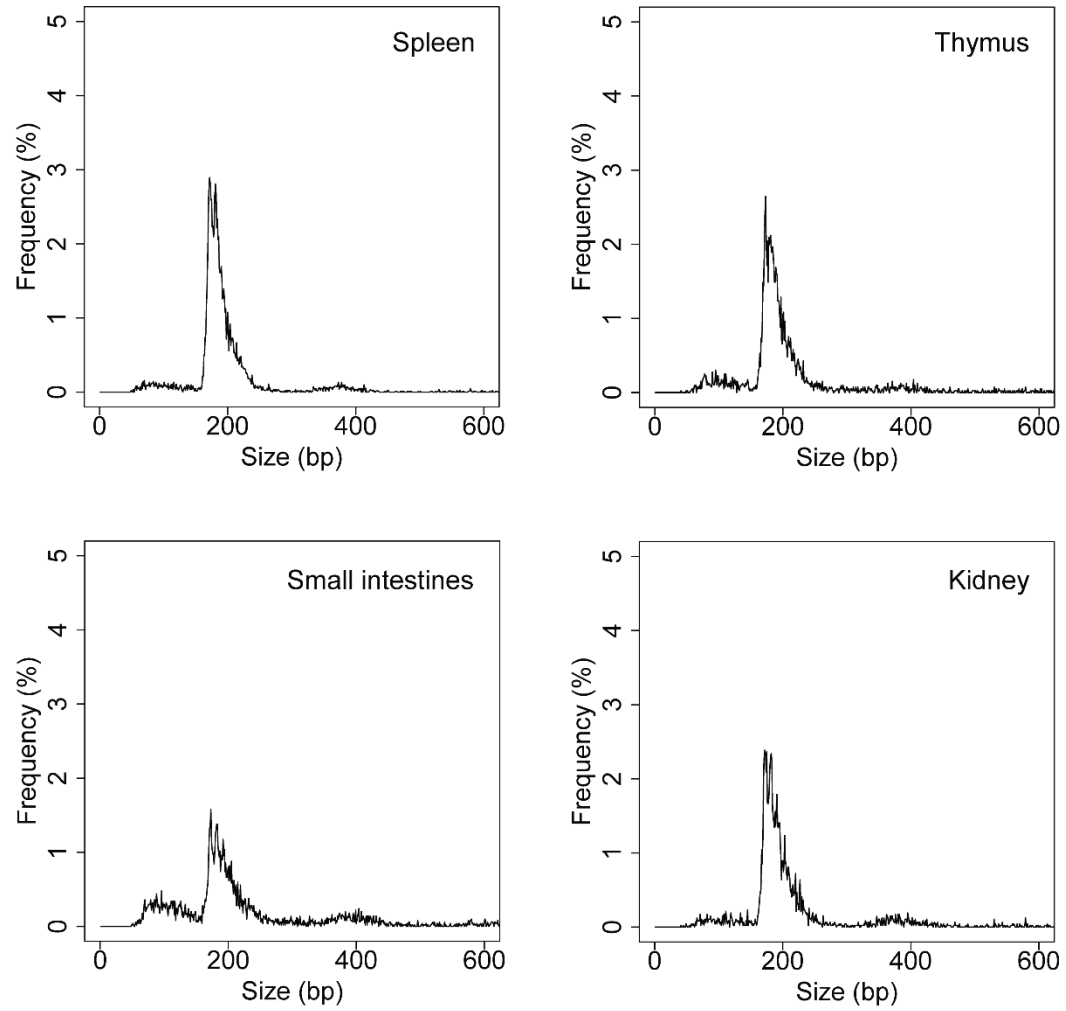

**Supplementary Figure 6: Tissue eccDNA size comparisons using the RCA method.**

(A) AUC ratios of liver eccDNA of individual mice.  $P = 0.93$ , Kruskal-Wallis test. (B)

AUC ratios of buffy coat eccDNA of individual mice.  $P = 0.93$ , Kruskal-Wallis test.

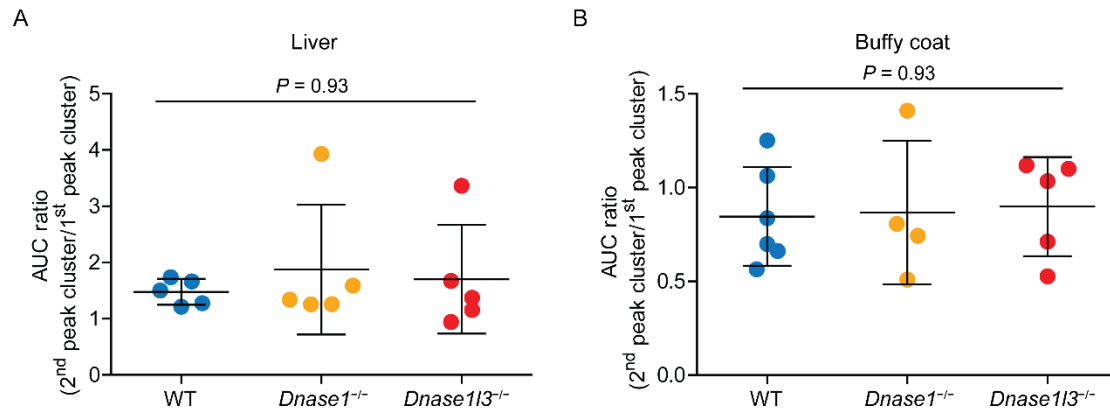

**Supplementary Figure 7:** Size profiles of (A) shared (predominately maternal-derived) and (B) fetal-derived eccDNA in the plasma of *Dnase1l3*<sup>-/-</sup> mice carrying *Dnase1l3*<sup>+/-</sup> fetuses. AUC values of the 1<sup>st</sup> and 2<sup>nd</sup> peak clusters are as labelled.

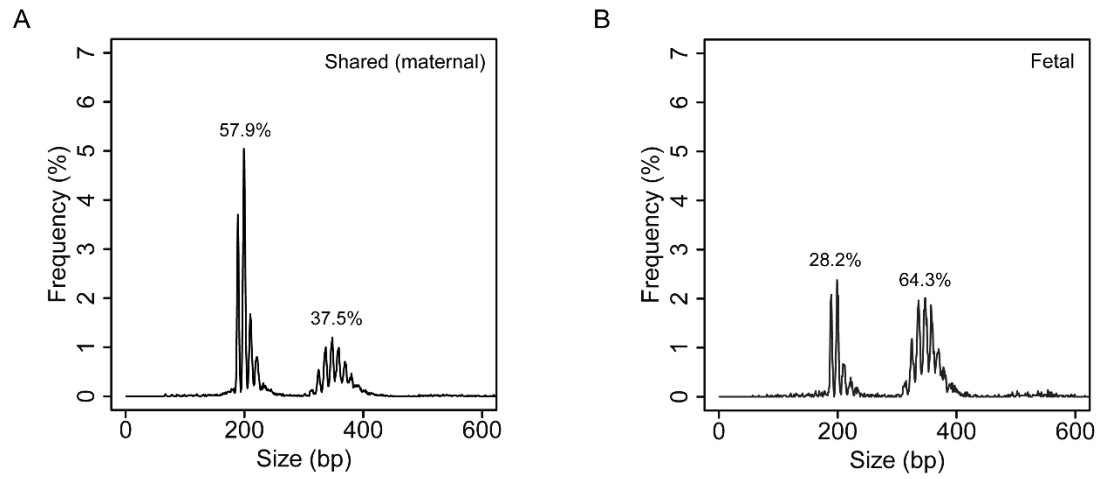

**Supplementary Figure 8:** Normalized eccDNA counts in human subjects with and without *DNASE1L3* mutations.

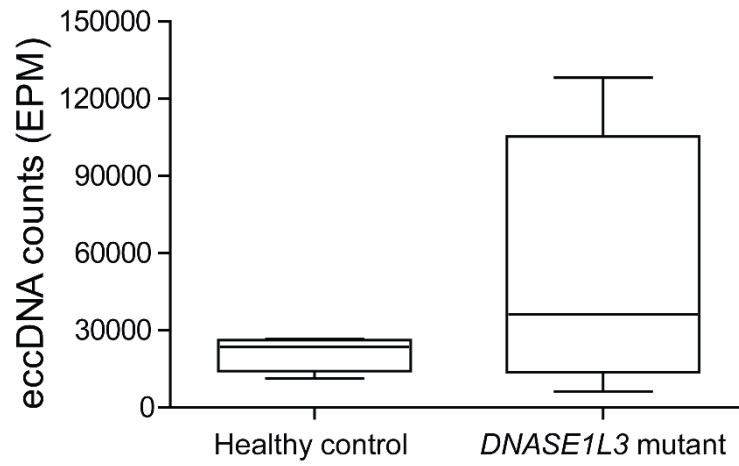



**Supplementary Figure 9:** EccDNA size profiles of individual plasma samples collected from healthy and *DNASE1L3*-mutated human subjects. HC: healthy control.

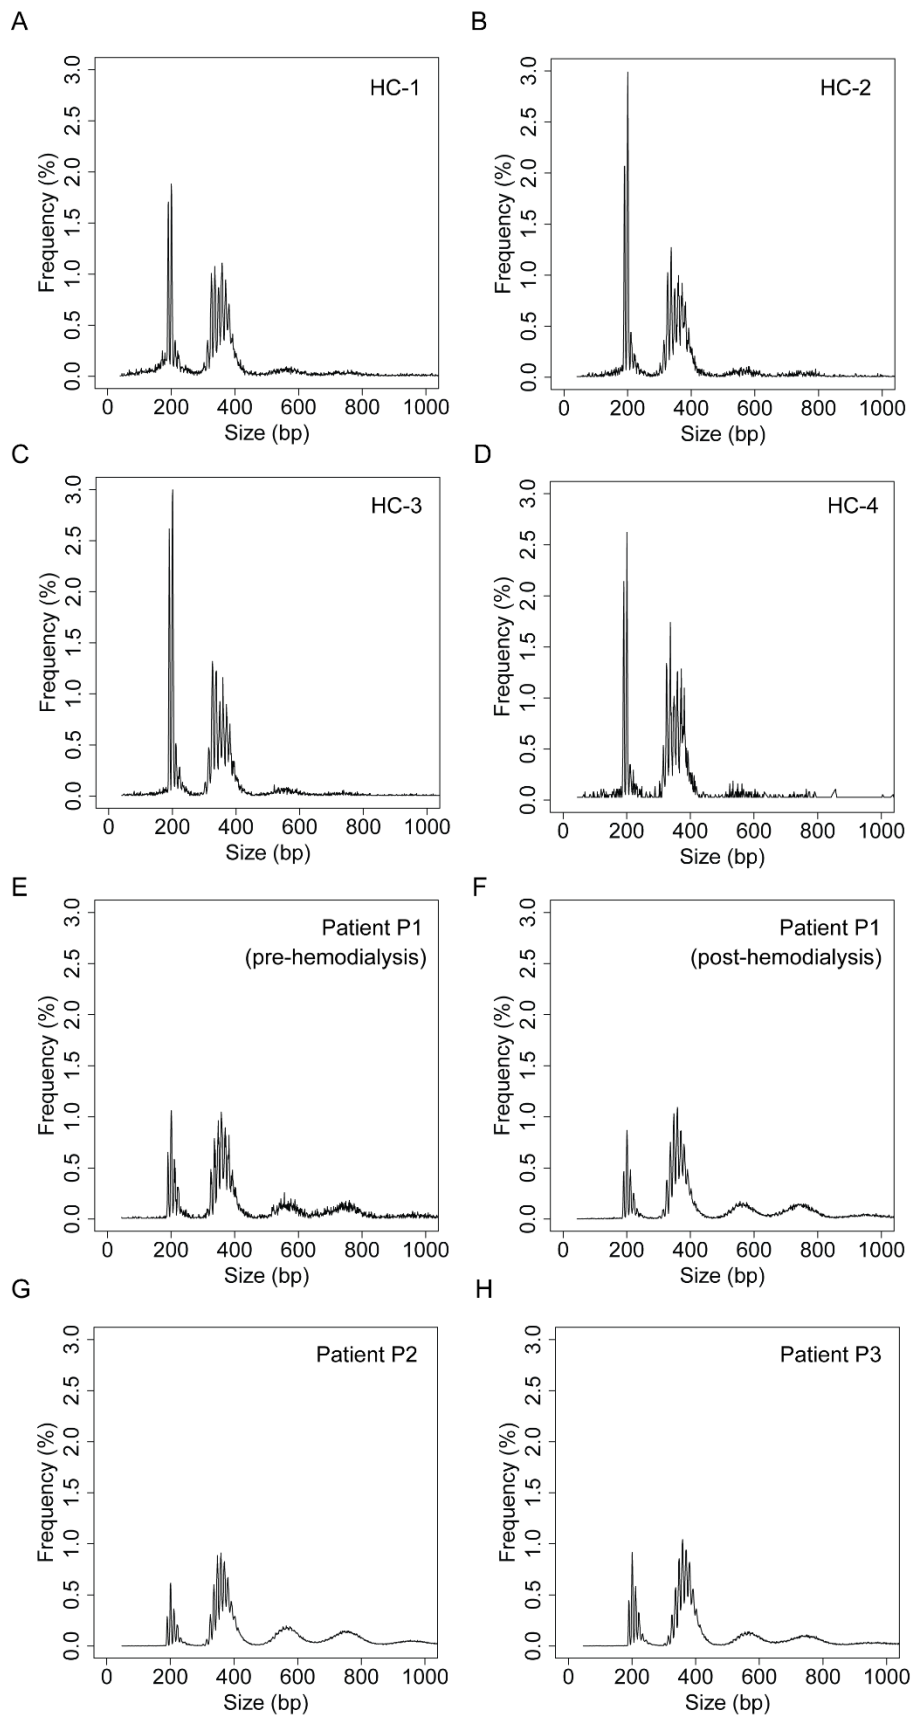

**Supplementary Table 1: Sequencing details of mouse plasma DNA samples. EPM:**  
eccDNA per million mappable reads.

| Sample                             | Raw reads  | Mapped reads | Mappability (%) | Normalized eccDNA counts (EPM) |
|------------------------------------|------------|--------------|-----------------|--------------------------------|
| WT-1                               | 22,262,301 | 11,484,399   | 50.6            | 2,825                          |
| WT-2                               | 20,981,365 | 14,039,663   | 67.0            | 3,742                          |
| WT-3                               | 15,805,715 | 7,069,685    | 44.7            | 1,640                          |
| WT-4                               | 17,352,765 | 4,290,827    | 24.7            | 2,153                          |
| WT-5                               | 12,033,253 | 6,518,666    | 54.2            | 6,468                          |
| WT-6                               | 16,411,921 | 6,187,107    | 37.7            | 6,952                          |
| WT-7                               | 17,694,509 | 7,295,671    | 41.2            | 4,441                          |
| WT-8                               | 15,232,602 | 6,289,094    | 41.3            | 5,381                          |
| WT-9                               | 18,092,570 | 7,785,377    | 43.0            | 3,286                          |
| WT-10                              | 20,152,676 | 8,359,660    | 41.5            | 1,404                          |
| WT-11                              | 16,595,559 | 7,233,149    | 43.6            | 1,826                          |
| WT-12                              | 18,925,094 | 9,484,730    | 50.1            | 1,935                          |
| <i>Dnase1</i> <sup>-/-</sup> -1    | 23,354,420 | 10,848,855   | 46.5            | 3,730                          |
| <i>Dnase1</i> <sup>-/-</sup> -2    | 16,161,775 | 6,004,268    | 37.2            | 3,580                          |
| <i>Dnase1</i> <sup>-/-</sup> -3    | 17,573,843 | 3,549,192    | 20.2            | 2,470                          |
| <i>Dnase1</i> <sup>-/-</sup> -4    | 14,607,504 | 1,745,551    | 11.9            | 3,366                          |
| <i>Dnase1</i> <sup>-/-</sup> -5    | 15,764,932 | 5,490,534    | 34.8            | 1,677                          |
| <i>Dnase1</i> <sup>-/-</sup> -6    | 14,462,973 | 7,327,291    | 50.7            | 4,320                          |
| <i>Dnase1</i> <sup>-/-</sup> -7    | 19,795,332 | 9,730,252    | 49.2            | 6,776                          |
| <i>Dnase1</i> <sup>-/-</sup> -8    | 19,611,100 | 8,597,020    | 43.8            | 5,680                          |
| <i>Dnase1</i> <sup>-/-</sup> -9    | 13,896,140 | 7,162,998    | 51.5            | 1,980                          |
| <i>Dnase1</i> <sup>-/-</sup> -10   | 12,409,262 | 5,359,667    | 43.2            | 5,568                          |
| <i>Dnase1</i> <sup>-/-</sup> -11   | 12,666,650 | 4,752,644    | 37.5            | 5,082                          |
| <i>Dnase1l3</i> <sup>-/-</sup> -1  | 19,037,213 | 3,137,802    | 16.5            | 15,830                         |
| <i>Dnase1l3</i> <sup>-/-</sup> -2  | 18,637,739 | 1,113,037    | 6.0             | 12,206                         |
| <i>Dnase1l3</i> <sup>-/-</sup> -3  | 26,555,335 | 15,005,907   | 56.5            | 1,241                          |
| <i>Dnase1l3</i> <sup>-/-</sup> -4  | 27,836,098 | 4,506,201    | 16.2            | 4,033                          |
| <i>Dnase1l3</i> <sup>-/-</sup> -5  | 20,194,544 | 2,706,402    | 13.4            | 14,587                         |
| <i>Dnase1l3</i> <sup>-/-</sup> -6  | 15,084,008 | 6,516,553    | 43.2            | 40,897                         |
| <i>Dnase1l3</i> <sup>-/-</sup> -7  | 11,845,852 | 4,411,255    | 37.2            | 17,825                         |
| <i>Dnase1l3</i> <sup>-/-</sup> -8  | 16,152,517 | 8,247,827    | 51.1            | 5,381                          |
| <i>Dnase1l3</i> <sup>-/-</sup> -9  | 14,648,472 | 7,680,299    | 52.4            | 2,557                          |
| <i>Dnase1l3</i> <sup>-/-</sup> -10 | 15,418,207 | 6,599,296    | 42.8            | 4,119                          |
| <i>Dnase1l3</i> <sup>-/-</sup> -11 | 15,330,036 | 6,58,3005    | 42.9            | 12,615                         |

**Supplementary Table 2:** Top 5 combinations of trinucleotide motifs flanking the eccDNA junctions in wild-type mice.

| I   | II  | III | IV  | Frequency (%) |
|-----|-----|-----|-----|---------------|
| TGT | GTG | TGT | GTG | 0.0403        |
| ACA | CAC | ACA | CAC | 0.0356        |
| GTG | TGT | GTG | TGT | 0.019         |
| CAC | ACA | CAC | ACA | 0.0185        |
| AAA | AAA | AAA | AAA | 0.0095        |

**Supplementary Table 3:** Top 5 combinations of trinucleotide motifs flanking the eccDNA junctions in *Dnase113*<sup>-/-</sup> mice.

| I   | II  | III | IV  | Frequency (%) |
|-----|-----|-----|-----|---------------|
| TGT | GTG | TGT | GTG | 0.0104        |
| ACA | CAC | ACA | CAC | 0.0095        |
| CAC | ACA | CAC | ACA | 0.0065        |
| GTG | TGT | GTG | TGT | 0.003         |
| AAA | CTT | TGA | CTT | 0.0027        |

**Supplementary Table 4: Details of mouse pregnancy samples.**

| Mouse ID | Mating pairs             |        |                          |        | Maternal age (weeks) | Days of pregnancy | Fetuses |                          |            | Total eccDNA detected | EccDNA covering informative SNPs |                | Fetal eccDNA fraction (%) |
|----------|--------------------------|--------|--------------------------|--------|----------------------|-------------------|---------|--------------------------|------------|-----------------------|----------------------------------|----------------|---------------------------|
|          | Female                   |        | Male                     |        |                      |                   | Number  | <i>Dnase1l3</i> genotype | Strain     |                       | Shared                           | Fetal-specific |                           |
|          | <i>Dnase1l3</i> genotype | Strain | <i>Dnase1l3</i> genotype | Strain |                      |                   |         |                          |            |                       |                                  |                |                           |
| Mu582    | +/+                      | B6     | +/+                      | BALB/c | 12                   | 15                | 8       | +/+                      | B6, BALB/c | 100617                | 2178                             | 325            | 26.0%                     |
| Mu614    |                          |        |                          |        | 13                   | 19                | 9       |                          |            | 239898                | 4885                             | 869            | 30.2%                     |
| Mu617    |                          |        |                          |        | 12                   | 19                | 7       |                          |            | 249601                | 5602                             | 502            | 16.5%                     |
| Mu620    |                          |        |                          |        | 12                   | 16                | 8       |                          |            | 106471                | 1644                             | 231            | 24.6%                     |
| Mu597    | -/-                      | B6     | -/-                      | B6     | 13                   | 19                | 8       | -/-                      | B6         | 781293                | ---                              | ---            | ---                       |
| Mu616    |                          |        |                          |        | 13                   | 19                | 9       |                          |            | 242992                | ---                              | ---            | ---                       |
| Mu587    |                          |        |                          |        | 10                   | 16                | 7       |                          |            | 159028                | ---                              | ---            | ---                       |
| Mu586    | -/-                      | B6     | +/+                      | BALB/c | 12                   | 15                | 3       | +/-                      | B6, BALB/c | 160795                | 2709                             | 390            | 25.2%                     |
| Mu596    |                          |        |                          |        | 13                   | 18                | 4       |                          |            | 413757                | 6110                             | 1856           | 46.6%                     |
| Mu606    |                          |        |                          |        | 11                   | 15                | 9       |                          |            | 437321                | 6670                             | 987            | 25.8%                     |
| Mu615    |                          |        |                          |        | 12                   | 19                | 3       |                          |            | 503316                | 4367                             | 648            | 25.8%                     |
| Mu618    |                          |        |                          |        | 12                   | 16                | 3       |                          |            | 137275                | 2404                             | 448            | 31.4%                     |

**Supplementary Table 5: Sequencing details of human plasma samples.** HC: plasma samples from healthy control subjects.

| Samples                        | Raw reads   | Mapped reads | Mappability (%) | eccDNA loci |
|--------------------------------|-------------|--------------|-----------------|-------------|
| HC-1                           | 104,592,793 | 24,427,974   | 23.4            | 23,637      |
| HC-2                           | 216,521,242 | 10,099,476   | 4.7             | 13,456      |
| HC-3                           | 210,078,058 | 16,000,804   | 7.6             | 19,416      |
| HC-4                           | 111,990,276 | 4,389,800    | 3.9             | 3,737       |
| Patient P1 (pre-hemodialysis)  | 127,603,364 | 21,262,279   | 16.7            | 13,184      |
| Patient P1 (post-hemodialysis) | 187,323,954 | 64,355,668   | 34.4            | 81,634      |
| Patient P2                     | 201,156,353 | 78,998,438   | 39.3            | 380,521     |
| Patient P3                     | 181,482,761 | 116,864,599  | 64.4            | 242,735     |
